# Supplementary material for: Reducing gas-sensing performance of Ce-doped SnO2 thin films through a cosputtering method
Source: Royal Society of Chemistry journal article supplement (doi:10.1039/c6ra25853k), 2017-01-01

## Electronic Supplementary Information

1. XRD pattern of the Ce-doped  $\text{SnO}_2$  thin film prepared at 80W Ce sputtering power.

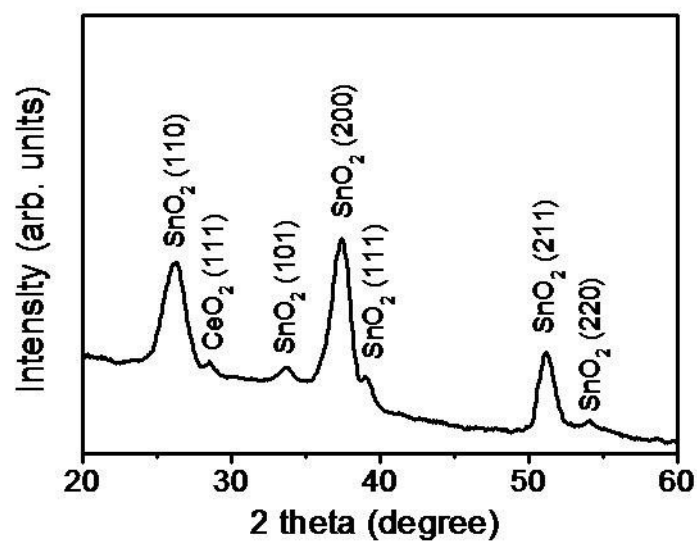

Supplement: c6ra25853k1.pdf [file c6ra25853k1.pdf]
